# Supplementary material
Source: publisher figshare collection journal article supplement (https://rs.figshare.com/ndownloader/files/30624241)
Supplement: Supplementary file 1 [file 30624241]

## Sheet: Sheet1
Predictor (k)	Total effect				Direct effect (ADE)				Indirect effect (ACME)			b path				a path				Time since intake (a path)				Relationship value intake (a path)				Relationship value intake x Time since intake (a path)
	b (se)	95% CI	t(df)	p (semi-partial r2)	b (se)	95% CI	t(df)	p (semi-partial r2)	b	95% CI	p	b (se)	95% CI	t(df)	p (semi-partial r2)	b (se)	95% CI	t(df)	p (semi-partial r2)	b (se)	95% CI	t(df)	p (semi-partial r2)	b (se)	95% CI	t(df)	p (semi-partial r2)	b (se)	95% CI	t(df)	p (semi-partial r2)
Valence (532)
Help	0.20 (0.04)	[0.12; 0.27]	5.12 (489.66)	< .001 (.04)	0.12 (0.04)	[0.12; 0.27]	2.98 (496.90)	.003 (.04)	0.09	[0.06; 0.12]	< .001	0.51 (0.07)	[.30; .70]	7.35 (504.40)	< .001 (.04)	0.16 (0.020	[0.11; 0.20]	6.70 (520.980	< .001 (0.08)	0.25 (0.21)	[-0.16; 0.66]	1.21 (506.71)	.229 (.003)	0.73 (0.06)	[0.60; 0.85]	11.57 (515.32)	< .001 (.20)	-0.001 (0.003)	[-0.01; 0.004]	-0.63 (505.64)	.532 (.001)
Confront	0.05 (0.05)	[-0.06; 0.16]	0.88 (510.26)	.378 (.001)	0.02 (0.06)	[-0.09; 0.13]	0.34 (516.47)	.735 (< .001)	0.04	[0.02; 0.07]	<.001	0.18 (0.10)	-0.02; 0.38]	1.79 (523.35)	.074 (.01)	0.16 (0.020	[0.11; 0.20]	6.70 (520.980	< .001 (0.08)	0.25 (0.21)	[-0.16; 0.66]	1.21 (506.71)	.229 (.003)	0.73 (0.06)	[0.60; 0.85]	11.57 (515.32)	< .001 (.20)	-0.001 (0.003)	[-0.01; 0.004]	-0.63 (505.64)	.532 (.001)
Avoid	-0.17 (0.04)	[-0.24; -0.10]	-4.84 (520.19)	< .001 (.04)	-0.12 (0.04)	[-0.19; -0.05]	-3.31 (523.84)	.001 (.02)	-0.06	[-0.08; -0.04]	< .001	-0.33 (0.06)	[-0.46; -0.20]	-5.11 (526.00)	< .001 (.05)	0.16 (0.020	[0.11; 0.20]	6.70 (520.980	< .001 (0.08)	0.25 (0.21)	[-0.16; 0.66]	1.21 (506.71)	.229 (.003)	0.73 (0.06)	[0.60; 0.85]	11.57 (515.32)	< .001 (.20)	-0.001 (0.003)	[-0.01; 0.004]	-0.63 (505.64)	.532 (.001)
Warmth (338)
Help	0.33 (0.04)	[0.25l 0.42]	7.70 (330.31)	< .001 (0.15)	0.21 (0.04)	[0.13; 0.30]	4.90 (329.91)	< .001 (0.07)	0.14	[0.09; 0.18]	< .001	0.46 (0.07)	[0.32; 0.60]	6.38 (331.98)	< .001 (.11)	0.25 (0.03)	[0.19; 0.31]	7.98 (332.62)	< .001 (.16)	0.40 (0.28)	[-0.15; 0.94]	1.42 (310.14)	.155 (.01)	0.72 (0.08)	[0.56; 0.88]	8.65 (329.85)	< .001 (.18)	-0.003 (0.003)	[-0.01; 0.004]	-0.63 (315.04)	.408 (.002)
Confront	0.10 (0.07)	[-0.03; 0.23]	1.52 (331.34)	.131 (.01)	0.05 (0.07)	[-0.09; 0.20]	0.74 (331.82)	.458 (.002)	0.06	[0.02; 0.12]	0.004	0.19 (0.12)	[-0.04; 0.42]	1.63 (329.18)	.104 (.01)	0.25 (0.03)	[0.19; 0.31]	7.98 (332.62)	< .001 (.16)	0.40 (0.28)	[-0.15; 0.94]	1.42 (310.14)	.155 (.01)	0.72 (0.08)	[0.56; 0.88]	8.65 (329.85)	< .001 (.18)	-0.003 (0.003)	[-0.01; 0.004]	-0.63 (315.04)	.408 (.002)
Avoid	-0.28 (0.05)	[-0.37; -0.19]	-5.99 (330.46)	< .001 (.10)	-0.22 (0.05)	[-0.31; -0.11]	-4.34 (327.85)	< .001 (.06)	-0.09	[-0.12; -0.05]	< .001	-0.25 (0.08)	[-0.41; -0.09]	-3.10 (330.77)	.002 (.03)	0.25 (0.03)	[0.19; 0.31]	7.98 (332.62)	< .001 (.16)	0.40 (0.28)	[-0.15; 0.94]	1.42 (310.14)	.155 (.01)	0.72 (0.08)	[0.56; 0.88]	8.65 (329.85)	< .001 (.18)	-0.003 (0.003)	[-0.01; 0.004]	-0.63 (315.04)	.408 (.002)
Competence (315)
Help	0.33 (0.04)	[ 0.25; 0.42]	7.70 (330.31)	< .001 (.15)	0.02 (0.04)	[-0.05; 0.10]	0.56 (293.58)	.579 (.001)	0.09	[0.05; 0.13]	< .001	0.62 (0.07)	[0.49; 0.77]	8.44 (308.02)	< .001 (.19)	0.13 (0.03)	[0.07; 0.18]	4.45 (298.94)	< .001 (.06)	0.31 (0.27)	[0.22; 0.84]	1.16 (278.50)	.248 (.004)	0.76 (0.08)	[0.60; 0.92]	8.93 (302.36)	< .001 (.20	-0.003 (0.004)	[-0.01; 0.005]	-0.72 (281.13)	.474 (.002)
Confront	0.06 (0.06)	[-0.06; 0.18]	0.99 (295.18)	.324 (.003)	0.02 (0.06)	[-0.10; 0.14]	0.29 (299.80)	.774 (< .001)	0.04	[0.02; 0.07]	< .001	0.34 (0.12)	[0.11; 0.57]	2.84 (308.97)	.005 (.03)	0.13 (0.03)	[0.07; 0.18]	4.45 (298.94)	< .001 (.06)	0.31 (0.27)	[0.22; 0.84]	1.16 (278.50)	.248 (.004)	0.76 (0.08)	[0.60; 0.92]	8.93 (302.36)	< .001 (.20	-0.003 (0.004)	[-0.01; 0.005]	-0.72 (281.13)	.474 (.002)
Avoid	-0.10 (0.04)	[-0.19; -0.01]	-2.26 (301.49)	.025 (.02)	-0.05 (0.04)	[-0.14; 0.03]	-1.23 (304.19)	.220 (.01)	-0.06	-0.09; -0.03]	< .001	-0.36 (0.09)	[-0.53; -0.19]	-4.17 (308.94)	< .001 (.05)	0.13 (0.03)	[0.07; 0.18]	4.45 (298.94)	< .001 (.06)	0.31 (0.27)	[0.22; 0.84]	1.16 (278.50)	.248 (.004)	0.76 (0.08)	[0.60; 0.92]	8.93 (302.36)	< .001 (.20	-0.003 (0.004)	[-0.01; 0.005]	-0.72 (281.13)	.474 (.002)
Dominance (343)
Help	0.05 (0.05)	[-0.05; 0.14]	0.96 (308.16)	.339 (.003)	0.01 (0.04)	-0.08; 0.09]	0.17 (307.47)	.867 (< .001)	0.04	[-0.002; 0.09]	0.06	0.63 (0.07)	[0.49; 0.77]	8.54 (335.41)	< .001 (.18)	0.06 (0.03)	[-0.002; 0.12]	1.88 (326.50)	.061 (.01)	0.64 (0.27)	[0.11; 1.18]	2.35 (303.77)	.019 (.02)	0.87 (0.08)	[0.71; 1.03]	10.83 (325.71)	< .001 (.25)	-0.01 (0.004)	[-0.01; 0.001]	-1.79 (304.69)	.075 (.01)
Confront	-0.03 (0.07)	[-0.16; 0.10]	-0.41 (305.19)	.682 (< .001)	-0.05 (0.07)	[-0.17; 0.08]	-0.71 (308.59)	.480 (.001)	0.02	[-0.001; 0.05]	0.06	0.33 (0.11)	[0.12; 0.55]	2.99 (331.11)	.003 (.03)	0.06 (0.03)	[-0.002; 0.12]	1.88 (326.50)	.061 (.01)	0.64 (0.27)	[0.11;1.18]	2.35 (303.77)	.019 (.02)	0.87 (0.08)	[0.71; 1.03]	10.83 (325.71)	< .001 (.25)	-0.01 (0.004)	[-0.01; 0.001]	-1.79 (304.69)	.075 (.01)
Avoid	0.04 (0.05)	[-0.06; 0.14]	0.82 (333.94)	.412 (.002)	0.06 (0.05)	[-0.03; 0.16]	1.31 (334.30)	.189 (.01)	-0.03	[-0.06; 0.00]	0.06	-0.39 (0.08)	[-0.53; -0.23]	-4.83 (335.25)	< .001 (.07)	0.06 (0.03)	[-0.002; 0.12]	1.88 (326.50)	.061 (.01)	0.64 (0.27)	[0.11;1.18]	2.35 (303.77)	.019 (.02)	0.87 (0.08)	[0.71; 1.03]	10.83 (325.71)	< .001 (.25)	-0.01 (0.004)	[-0.01; 0.001]	-1.79 (304.69)	.075 (.01)
Trustworthiness (335)
Help	0.25 (0.04)	[0.17; 0.34]	6.02 (328.25)	< .001 (.10)	0.15 (0.04)	[0.07; 0.23]	3.51 (326.11)	.005 (.04)	0.12	[0.08; 0.17]	< .001	0.46 (0.07)	[0.33; 0.59]	6.93 (328.14)	< .001 (.13)	0.23 (0.03)	[0.16; 0.029]	6.97 (324.47)	< .001 (.130)	0.43 (0.28)	[-0.11; 0.97]	1.57 (317.54)	.118 (.01)	0.71 (0.08)	[0.54; 0.88]	8.48 (329.31)	< .001 (.18)	-0.003 (0.003)	[-0.01; 0.004]	-0.88 (318.49)	.380 (.002)
Confront	-0.02 (0.07)	[-0.15; 0.12]	-0.22 (329.11)	.826 (< .001)	-0.09 (0.07)	[-0.24; 0.05]	-1.27 (327.67)	.206 (.01)	0.09	[0.04; 0.14]	< .001	0.35 (0.12)	[0.12; 0.58]	2.99 (327.78)	.003 (.03)	0.23 (0.03)	[0.16; 0.029]	6.97 (324.47)	< .001 (.130)	0.43 (0.28)	[-0.11; 0.97]	1.57 (317.54)	.118 (.01)	0.71 (0.08)	[0.54; 0.88]	8.48 (329.31)	< .001 (.18)	-0.003 (0.003)	[-0.01; 0.004]	-0.88 (318.49)	.380 (.002)
Avoid	-0.24 (0.05)	[-0.33; -0.15]	-4.94 (329.70)	< .001 (.07)	-0.17 (0.05)	[-0.27; -0.07]	-3.72 (328.39)	.001 (.03)	-0.08	[-0.12; -0.05]	< .001	-0.30 (0.08)	[-0.45; -0.14]	-3.72 (327.67)	-0.04	0.23 (0.03)	[0.16; 0.029]	6.97 (324.47)	< .001 (.130)	0.43 (0.28)	[-0.11; 0.97]	1.57 (317.54)	.118 (.01)	0.71 (0.08)	[0.54; 0.88]	8.48 (329.31)	< .001 (.18)	-0.003 (0.003)	[-0.01; 0.004]	-0.88 (318.49)	.380 (.002)
Norm violation (532)
Help	-4.69 (3.41)	[-11.36; 2.00]	1.37 (509.86)	.170 (.004)	-0.22 (3.25)	[-6.57; 6.13]	-0.07 (511.19)	.946 (< .001)	-4.49	[-7.24; -1.87]	0.001	0.57 (0.07)	[0.44; 0.70]	8.40 (502.71)	< .001 (.11)	-4.69 (3.41)	[-11.36; 2.00]	-1.37 (509.86)	.170 (.004)	0.32 (0.22)	[-11.08; -2.98]	1.49 (508.73)	.138 (.02)	0.78 (0.06)	[0.66; 0.91]	12.23 (516.25)	< .001 (.22)	-0.003 (0.003)	[-0.01; 0.003]	-0.98 (507.51)	.328 (.002)
Confront	12.53 (4.63)	[3.48; 21.60]	2.71 (526.12)	.007 (.01)	0.14 (4.66)	[5.19; 23.41]	3.07 (526.00)	.002 (.02)	2.81	[1.19; 4.62]	< .001	0.24 (0.10)	[0.05; 0.43]	2.44 (523.20)	.015 (.01)	-4.69 (3.41)	[-11.36; 2.00]	-1.37 (509.86)	.170 (.004)	0.32 (0.22)	[-11.08; -2.98]	1.49 (508.73)	.138 (.02)	0.78 (0.06)	[0.66; 0.91]	12.23 (516.25)	< .001 (.22)	-0.003 (0.003)	[-0.01; 0.003]	-0.98 (507.51)	.328 (.002)
Avoid	15.81 (3.02)	[9.91; 21.73]	5.23 (526.67)	< .001 (.05)	13.43 (2.97)	[7.62; 19.24]	4.52 (523.00)	< .001 (.04)	-2.15	[-3.99; -0.75]	0.001	-0.35 (0.06)	[-0.47; 0.23]	-5.64 (525.95)	< .001 (.06)	-4.69 (3.41)	[-11.36; 2.00]	-1.37 (509.86)	.170 (.004)	0.32 (0.22)	[-11.08; -2.98]	1.49 (508.73)	.138 (.02)	0.78 (0.06)	[0.66; 0.91]	12.23 (516.25)	< .001 (.22)	-0.003 (0.003)	[-0.01; 0.003]	-0.98 (507.51)	.328 (.002)
